# Supplementary material for: miR-155 harnesses Phf19 to potentiate cancer immunotherapy through epigenetic reprogramming of CD8+ T cell fate
Source: PubMed Central journal article supplement (PMC6517388; doi:10.1038/s41467-019-09882-8), 2019-05-14
Supplement: 41467_2019_9882_MOESM4_ESM.pdf [file 41467_2019_9882_MOESM4_ESM.pdf]

## Description of Additional Supplementary Files

File Name: Supplementary Data 1

Description: Top 15 gene datasets negatively enriched in miR-155 cells.

File Name: Supplementary Data 2

Description: Differentially expressed genes by RNA-seq of Pmel-1 transduced with miR-155.

File Name: Supplementary Data 3

Description: Genes uniquely marked by H3K27me3 in control or miR-155 cells.

File Name: Supplementary Data 4

Description: Gene datasets shared between Phf19<sup>-/-</sup> (negatively) and miR-155 cells (positively).

File Name: Supplementary Data 5

Description: Gene datasets shared between Phf19<sup>-/-</sup> (positively) and miR-155 cells (negatively).
